# Supplementary material for: Historically consistent mass loss projections of the Greenland ice sheet
Source: Copernicus journal article supplement (doi:10.5194/egusphere-2024-922), 2024-04-29
Supplement: Supplementary file 1 [file egusphere-2024-922-supplement.pdf]

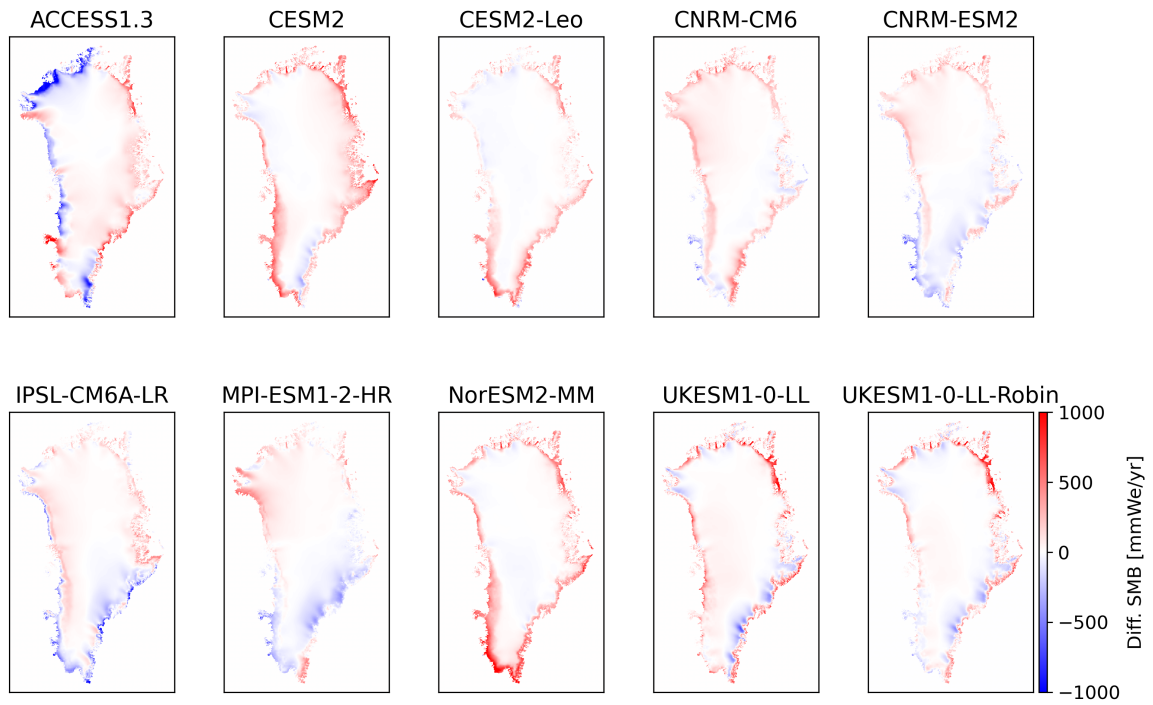

**Figure S1.** Differences in reference SMB (mean annual SMB of 1960-1989) between various ESMs and ERA5-reanalysis used for initialization of the ice sheet.

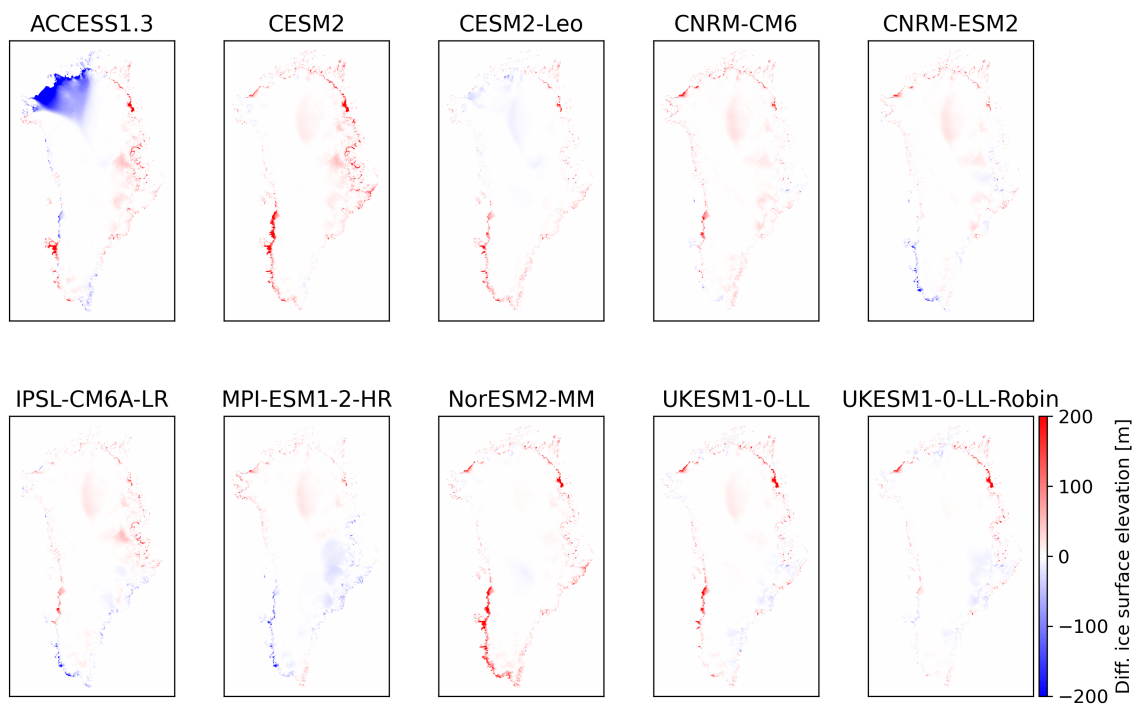

**Figure S2.** Differences in ice surface elevation with respect to the ERA5-initialization for various ESM-initializations.

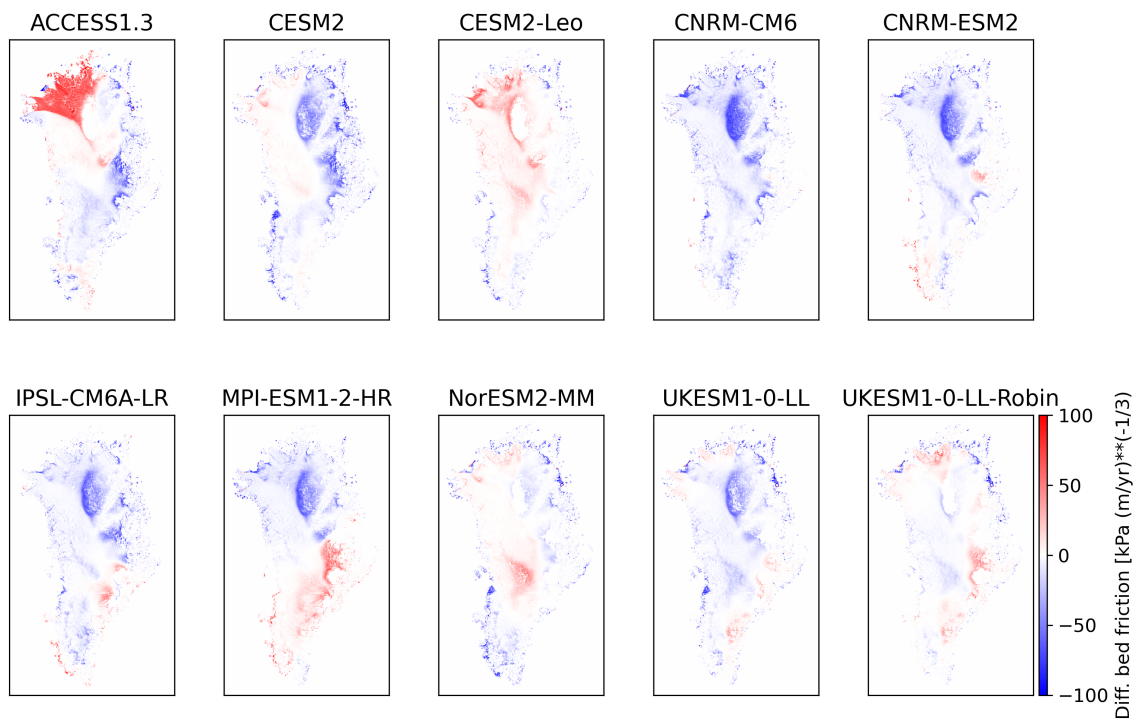

**Figure S3.** Differences in bed friction field with respect to the ERA5-initialization for various ESM-initializations.
